# Supplementary material for: A High-Throughput Immune-Oncology Screen Identifies Immunostimulatory Properties of Cytotoxic Chemotherapy Agents in TNBC
Source: Preprints.org preprint supplement (doi:10.20944/preprints202411.0535.v1), 2024-11-08
Supplement: Supplementary file 1 [file supplementary]

Supplementary material


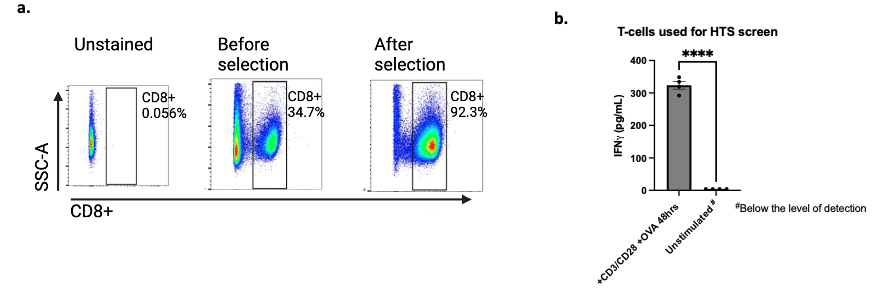


Figure S1 Tool validation **a.** Confirmation of enrichment of CD8+ T-cell population after magnetic bead selection. **b.** Confirmation of action status of CD8+ T-cells used in HTS assay. IFNy measured by ELISA analysis of cell culture supernatants. The unpaired student’s t-test used for statistical comparison ****=p<0.0001.


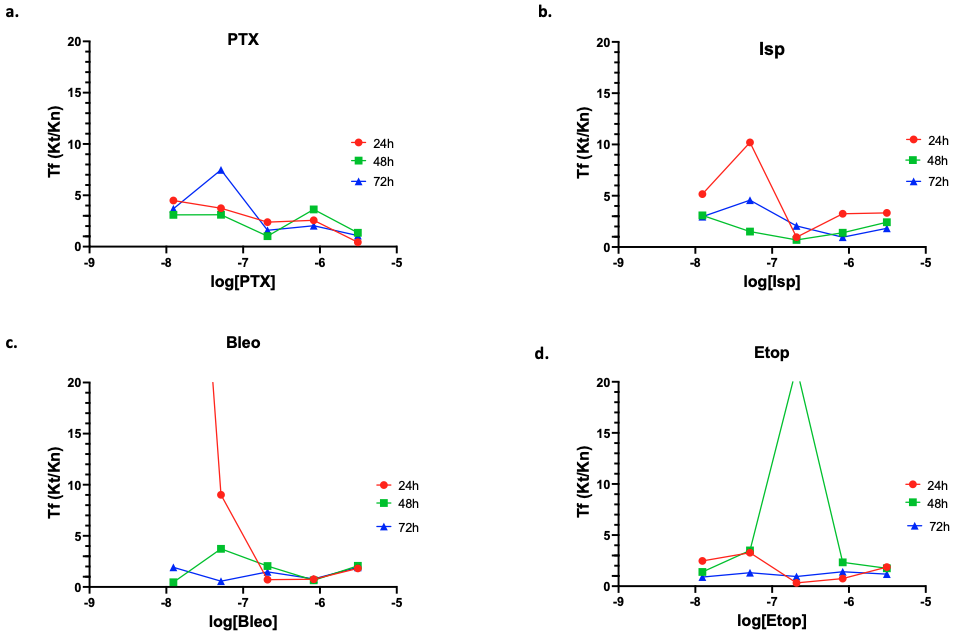


Figure S2 Sample Tf v log[drug] curves used for AUC calculations (a) PTX (b) Isp (c) Bleo (d) Etop

Table S1 AUC and SD values for all 448 compounds in Anti-Cancer compound library

| **Drug name** | **24 hr AUC** | **48 hr AUC** | **72hr AUC** | **avg AUC** | **St Dev** |
| --- | --- | --- | --- | --- | --- |
| MK-2866 (GTx-024) | 11.65 | 5.82 | 4.29 | 7.25 | 3.89 |
| BIIB021 | 4.06 | 5.92 | 3.92 | 4.63 | 1.12 |
| AZ628 | 3.47 | 4.21 | 4.39 | 4.02 | 0.49 |
| Altretamine (Hexalen) | 35.50 | 5.33 | 2.93 | 14.59 | 18.15 |
| Crizotinib (PF-02341066) | 6.79 | 8.52 | 7.96 | 7.76 | 0.88 |
| Lenalidomide | 2.22 | 5.43 | 5.77 | 4.48 | 1.96 |
| BIBR1532 | 5.33 | 8.41 | 8.74 | 7.49 | 1.88 |
| Cediranib (AZD2171) | 3.82 | 3.15 | 2.57 | 3.18 | 0.62 |
| Cladribine | 3.80 | 4.62 | 8.70 | 5.71 | 2.63 |
| Bicalutamide (Casodex) | 3.27 | 4.16 | 4.59 | 4.01 | 0.68 |
| Sirtinol | 2.50 | 3.12 | 2.20 | 2.61 | 0.47 |
| Streptozotocin (Zanosar) | 2.57 | 3.49 | 2.36 | 2.81 | 0.60 |
| Cediranib (AZD2171) | 4.01 | 4.59 | 6.67 | 5.09 | 1.40 |
| Temsirolimus (Torisel) | 5.40 | 3.50 | 4.19 | 4.36 | 0.96 |
| ENMD-2076 | 22.12 | 3.23 | 2.09 | 9.15 | 11.25 |
| Motesanib Diphosphate (AMG-706) | 3.11 | 3.23 | 2.11 | 2.82 | 0.61 |
| Nelarabine (Arranon) | 4.10 | 7.41 | 5.68 | 5.73 | 1.66 |
| Decitabine | 4.95 | 3.67 | 3.79 | 4.14 | 0.71 |
| Vinorelbine Tartrate | 2.29 | 3.55 | 1.68 | 2.51 | 0.95 |
| Zileuton | 5.36 | 6.63 | 8.44 | 6.81 | 1.55 |
| GSK1904529A | 1.48 | 12.65 | 4.53 | 6.22 | 5.77 |
| AUY922 (NVP-AUY922) | 2.09 | 4.79 | 4.82 | 3.90 | 1.56 |
| NPI-2358 (Plinabulin) | 2.16 | 1.60 | 1.50 | 1.76 | 0.36 |
| Trichostatin A | 3.43 | 2.34 | 1.37 | 2.38 | 1.03 |
| Ku-0063794 | 3.10 | 4.86 | 4.50 | 4.15 | 0.93 |
| Ruxolitinib (INCB018424) | 1.59 | 1.91 | 4.98 | 2.83 | 1.87 |
| VS-5584 (SB2343) | 2.86 | 3.86 | 1.72 | 2.82 | 1.07 |
| AEE788 (NVP-AEE788) | 30.06 | 3.95 | 2.40 | 12.14 | 15.54 |
| Danusertib (PHA-739358) | 4.23 | 7.59 | 3.87 | 5.23 | 2.05 |
| JNJ 26854165 (Serdemetan) | 2.97 | 3.88 | 3.46 | 3.44 | 0.45 |
| 1-(T-Butyl)-3-(2-((4-(diethylamino)butyl)amino) | 2.88 | 2.99 | 1.90 | 2.59 | 0.60 |
| PHA-665752 | 2.69 | 2.92 | 1.69 | 2.44 | 0.65 |
| Vincristine Sulfate | 3.30 | 2.24 | 4.76 | 3.43 | 1.26 |
| XL-184 (Cabozantinib) | 3.75 | 4.80 | 4.60 | 4.38 | 0.56 |
| HSP990 (NVP-HSP990) | 4.13 | 2.88 | 1.83 | 2.94 | 1.15 |
| Aprepitant (MK-0869) | 4.21 | 6.50 | 2.38 | 4.36 | 2.06 |
| SRT1720 | 1.28 | 2.42 | 2.83 | 2.18 | 0.80 |
| ABT-751 (E7010) | 1.83 | 3.98 | 5.44 | 3.75 | 1.82 |
| LY2228820 | 4.68 | 11.85 | 4.29 | 6.94 | 4.26 |
| Belinostat (PXD101) | 2.63 | 10.00 | 3.28 | 5.30 | 4.08 |
| Mercaptopurine | 2.27 | 3.88 | 3.88 | 3.34 | 0.93 |
| CH5138303 | 2.23 | 2.65 | 3.19 | 2.69 | 0.48 |
| PCI-32765 (Ibrutinib) | 1.24 | 3.80 | 2.72 | 2.59 | 1.29 |
| VU0415267-2 | 2.55 | 5.38 | 2.14 | 3.36 | 1.76 |
| Barasertib (AZD1152-HQPA), AZD1152 | 2.48 | 2.21 | 3.19 | 2.63 | 0.50 |
| Ispinesib (SB-715992) | 11.30 | 3.82 | 6.05 | 7.06 | 3.84 |
| Nedaplatin | 3.82 | 5.01 | 2.22 | 3.68 | 1.40 |
| JNJ-26481585 | 4.79 | 4.27 | 2.14 | 3.73 | 1.40 |
| Pelitinib (EKB-569) | 3.77 | 4.66 | 5.92 | 4.78 | 1.08 |
| Flavopiridol (Alvocidib) HCl | 3.54 | 6.10 | 3.28 | 4.31 | 1.56 |
| Amuvatinib (MP-470) | 1.74 | 3.40 | 2.72 | 2.62 | 0.84 |
| PHA-793887 | 3.14 | 4.05 | 3.37 | 3.52 | 0.47 |
| Bosutinib (SKI-606) | 2.50 | 3.13 | 3.41 | 3.01 | 0.47 |
| SB 525334 | 1.70 | 3.86 | 4.06 | 3.21 | 1.31 |
| Docetaxel (Taxotere) | 2.13 | 6.01 | 3.02 | 3.72 | 2.03 |
| GSK690693 | 1.77 | 2.43 | 1.32 | 1.84 | 0.56 |
| MK-1775 | 5.07 | 3.68 | 6.68 | 5.14 | 1.50 |
| INK 128 (MLN0128) | 1.95 | 3.26 | 6.02 | 3.74 | 2.08 |
| AC480 (BMS-599626) | 2.84 | 1.82 | 6.04 | 3.57 | 2.20 |
| olaparib | 2.94 | 1.70 | 5.00 | 3.21 | 1.66 |
| Paclitaxel (Taxol) | 6.76 | 6.01 | 8.20 | 6.99 | 1.11 |
| Epothilone B (EPO906, Patupilone) | 1.59 | 3.79 | 4.48 | 3.29 | 1.51 |
| AT9283 | 3.01 | 11.49 | 7.70 | 7.40 | 4.25 |
| SNS-314 Mesylate | 1.36 | 2.63 | 6.04 | 3.35 | 2.42 |
| PIK-93 | 3.74 | 4.35 | 5.34 | 4.48 | 0.81 |
| Pazopanib | 2.34 | 1.57 | 3.28 | 2.40 | 0.86 |
| BI 2536 | 7.86 | 1.51 | 2.94 | 4.10 | 3.33 |
| A-769662 | 80.24 | 2.26 | 8.53 | 30.34 | 43.33 |
| Axitinib | 4.32 | 4.80 | 8.99 | 6.03 | 2.57 |
| Zibotentan (ZD4054) | 2.56 | 3.36 | 4.96 | 3.62 | 1.22 |
| CI-1040 (PD184352) | 2.16 | 2.91 | 6.78 | 3.95 | 2.48 |
| Xanthohumol | 66.92 | 2.31 | 4.26 | 24.50 | 36.75 |
| CHIR-99021 (CT99021) HCl | 4.71 | 4.52 | 9.25 | 6.16 | 2.68 |
| RO5126766 (CH5126766) | 2.67 | 2.66 | 5.51 | 3.61 | 1.64 |
| YM155 (Sepantronium Bromide) | 5.55 | 24.69 | 6.51 | 12.25 | 10.78 |
| Dexamethasone acetate | 1.29 | 1.32 | 9.28 | 3.96 | 4.61 |
| YM201636 | 9.77 | 6.11 | 7.65 | 7.85 | 1.84 |
| TAPI-1 | 3.24 | 4.06 | 8.90 | 5.40 | 3.06 |
| PD0325901 | 3.31 | 2.54 | 4.02 | 3.29 | 0.74 |
| ESI-09 | 2.93 | 2.16 | 7.33 | 4.14 | 2.79 |
| Chlorambucil | 5.67 | 6.54 | 8.11 | 6.77 | 1.23 |
| PharmaGSID_48511 | 3.00 | 2.39 | 5.69 | 3.69 | 1.75 |
| ABT-888 (Veliparib) | 3.79 | 2.37 | 6.06 | 4.07 | 1.86 |
| Pomalidomide | 5.91 | 3.60 | 5.65 | 5.05 | 1.27 |
| Flavopiridol (Alvocidib) HCl | 4.27 | 5.00 | 5.58 | 4.95 | 0.66 |
| INH6 | 4.39 | 8.31 | 12.01 | 8.23 | 3.81 |
| SB 216763 | 450.35 | 3.56 | 7.04 | 153.65 | 256.96 |
| Santacruzamate A (CAY10683) | 1.92 | 4.53 | 9.14 | 5.20 | 3.66 |
| HS-173 | 4.69 | 4.67 | 4.79 | 4.72 | 0.06 |
| Dacomitinib (PF299804, PF-00299804) | 2.85 | 2.63 | 7.46 | 4.31 | 2.73 |
| VU0485685-2 | 3.21 | 2.07 | 6.16 | 3.81 | 2.11 |
| Tretinoin (Aberela) | 2.08 | 11.16 | 8.74 | 7.33 | 4.70 |
| Tipifarnib (Zarnestra) | 3.75 | 3.45 | 5.36 | 4.19 | 1.03 |
| EW-7197 | 3.30 | 2.75 | 7.26 | 4.44 | 2.46 |
| Refametinib (RDEA119, Bay 86-9766) | 2.10 | 2.44 | 4.71 | 3.08 | 1.42 |
| Epacadostat (INCB024360) | 2.25 | 3.22 | 5.38 | 3.62 | 1.61 |
| PH-797804 | 8.36 | 4.68 | 6.56 | 6.53 | 1.84 |
| ABT-737 | 1.14 | 1.43 | 4.58 | 2.38 | 1.91 |
| MLN8237 (Alisertib) | 2.60 | 1.51 | 5.71 | 3.27 | 2.18 |
| Estradiol | 4.17 | 1.73 | 6.72 | 4.21 | 2.49 |
| 3,5,7,8-Tetrahydro-2- | 7.14 | 4.18 | 10.07 | 7.13 | 2.94 |
| ZSTK474 | 3.44 | 3.14 | 6.13 | 4.24 | 1.65 |
| Triciribine | 5.08 | 33.54 | 9.20 | 15.94 | 15.38 |
| NSC348884 | 3.36 | 10.40 | 9.61 | 7.79 | 3.86 |
| 3-Methyladenine (3-MA) | 3.11 | 2.48 | 5.11 | 3.57 | 1.37 |
| Linifanib (ABT-869) | 2.04 | 2.45 | 3.54 | 2.68 | 0.78 |
| Dovitinib (TKI-258, CHIR-258) | 45.98 | 3.98 | 5.59 | 18.52 | 23.80 |
| Ranolazine (Ranexa) | 11.78 | 2.51 | 4.99 | 6.42 | 4.80 |
| OSI-930 | 14.67 | 6.99 | 11.31 | 10.99 | 3.85 |
| JNJ-38877605 | 3.47 | 2.93 | 5.36 | 3.92 | 1.28 |
| Andarine (GTX-007) | 2.42 | 3.12 | 5.15 | 3.56 | 1.42 |
| HJC0350 | 2.42 | 2.01 | 4.35 | 2.92 | 1.25 |
| Irinotecan HCl Trihydrate (Campto) | 2.10 | 1.72 | 1.66 | 1.83 | 0.24 |
| Nutlin-3 | 3.29 | 2.25 | 5.67 | 3.74 | 1.75 |
| Cyclophosphamide monohydrate | 1.58 | 2.88 | 2.59 | 2.35 | 0.68 |
| Mitoxantrone Hydrochloride | 2.38 | 2.70 | 2.47 | 2.52 | 0.16 |
| PTC-209 HBr | 0.99 | 1.76 | 1.88 | 1.54 | 0.48 |
| Everolimus (RAD001) | 3.13 | 3.93 | 2.68 | 3.25 | 0.64 |
| PI-1840 | 2.36 | 1.79 | 1.74 | 1.96 | 0.34 |
| VU0482726-2 | 1.45 | 3.04 | 1.99 | 2.16 | 0.81 |
| Pioglitazone hydrochloride (Actos) | 26.04 | 3.66 | 2.45 | 10.71 | 13.28 |
| VU0823849-2 | 2.03 | 3.60 | 2.40 | 2.68 | 0.82 |
| GSK461364 | 2.42 | 10.35 | 2.89 | 5.22 | 4.45 |
| Bexarotene | 1.93 | 1.43 | 1.51 | 1.62 | 0.26 |
| BV-6 | 4.79 | 3.84 | 3.13 | 3.92 | 0.84 |
| Capecitabine (Xeloda) | 2.38 | 2.16 | 3.84 | 2.79 | 0.91 |
| G-749 | 2.33 | 13.68 | 2.21 | 6.07 | 6.59 |
| GDC-0623 | 8.50 | 2.75 | 10.67 | 7.31 | 4.10 |
| R406(free base) | 3.78 | 4.42 | 4.71 | 4.30 | 0.47 |
| AZD6244 (Selumetinib) | 2.37 | 2.58 | 3.05 | 2.67 | 0.35 |
| Momelotinib (CYT387) | 2.04 | 2.50 | 1.68 | 2.07 | 0.41 |
| VU0814307-2 | 1.48 | 1.42 | 1.60 | 1.50 | 0.09 |
| VU0656797-2 | 2.46 | 2.57 | 2.19 | 2.41 | 0.19 |
| Nintedanib (BIBF 1120) | 2.05 | 2.55 | 4.72 | 3.11 | 1.42 |
| PX-478 2HCl | 2.53 | 6.25 | 1.64 | 3.47 | 2.44 |
| Tasquinimod | 1.59 | 1.40 | 2.04 | 1.68 | 0.33 |
| Ezetimibe (Zetia) | 3.19 | 1.50 | 2.16 | 2.28 | 0.85 |
| PI-103 | 2.25 | 2.88 | 3.25 | 2.79 | 0.51 |
| Mifepristone (Mifeprex) | 1.08 | 1.96 | 2.16 | 1.73 | 0.58 |
| TW-37 | 2.75 | 2.58 | 1.84 | 2.39 | 0.48 |
| Licochalcone A | 1.17 | 2.53 | 2.68 | 2.13 | 0.83 |
| Gefitinib (Iressa) | 3.42 | 13.37 | 2.19 | 6.33 | 6.13 |
| AZD6738 | 5.83 | 1.98 | 2.22 | 3.34 | 2.16 |
| Fulvestrant (Faslodex) | 2.14 | 2.05 | 2.73 | 2.31 | 0.37 |
| Roscovitine | 2.52 | 2.16 | 2.00 | 2.22 | 0.27 |
| SB-203580 | 1.10 | 1.83 | 2.49 | 1.81 | 0.70 |
| BIRB 796 (Doramapimod) | 2.74 | 2.10 | 5.03 | 3.29 | 1.54 |
| Ganetespib (STA-9090) | 1.23 | 1.90 | 1.60 | 1.58 | 0.34 |
| Masitinib (AB1010) | 79.46 | 1.13 | 2.04 | 27.54 | 44.96 |
| Rapamycin (Sirolimus) | 1.34 | 2.38 | 1.71 | 1.81 | 0.53 |
| tretazicar | 1.45 | 1.44 | 1.74 | 1.54 | 0.17 |
| Clofarabine | 1.87 | 2.26 | 1.43 | 1.85 | 0.41 |
| Saracatinib (AZD0530) | 2.65 | 1.91 | 1.83 | 2.13 | 0.45 |
| 17-AAG (Tanespimycin) | 1.09 | 1.70 | 5.31 | 2.70 | 2.28 |
| Estrone | 12.64 | 2.09 | 1.31 | 5.35 | 6.33 |
| AZD7762 | 2.14 | 1.43 | 4.90 | 2.82 | 1.83 |
| PCI-24781, CRA-02478 | 2.08 | 1.75 | 1.92 | 1.92 | 0.17 |
| GDC-0941 | 1.63 | 1.97 | 1.82 | 1.81 | 0.17 |
| cucurbitacin B | 1.05 | 1.34 | 1.28 | 1.22 | 0.15 |
| Fludarabine Phosphate (Fludara) | 2.20 | 1.55 | 1.64 | 1.80 | 0.35 |
| VX680 | 2.21 | 2.70 | 3.38 | 2.77 | 0.59 |
| Elesclomol (STA-4783) | 1.41 | 2.97 | 2.39 | 2.26 | 0.79 |
| Azathioprine (Azasan, Imuran) | 1.96 | 1.64 | 1.68 | 1.76 | 0.17 |
| PF 573228 | 1.80 | 2.36 | 1.71 | 1.96 | 0.35 |
| VU0549317-2 | 1.85 | 1.35 | 1.65 | 1.61 | 0.25 |
| MK-2206 dihydrochloride | 1.72 | 1.91 | 1.27 | 1.63 | 0.33 |
| FH535 | 2.29 | 3.73 | 3.07 | 3.03 | 0.72 |
| JNJ-7706621 | 2.37 | 1.60 | 7.65 | 3.87 | 3.29 |
| Ixazomib citrate | 5.78 | 1.69 | 1.79 | 3.09 | 2.33 |
| EX 527, SEN0014196 | 4.66 | 4.36 | 2.94 | 3.98 | 0.92 |
| Disulfiram (Antabuse) | 1.78 | 2.40 | 2.28 | 2.15 | 0.33 |
| Tie2 kinase inhibitor | 6.69 | 2.98 | 2.13 | 3.94 | 2.43 |
| Carmofur | 13.05 | 2.07 | 2.13 | 5.75 | 6.32 |
| Afuresertib (GSK2110183) | 4.00 | 5.39 | 2.57 | 3.99 | 1.41 |
| PRI-724 | 2.93 | 2.48 | 6.36 | 3.92 | 2.12 |
| Topotecan HCl | 4.86 | 3.99 | 3.13 | 4.00 | 0.86 |
| Degrasyn (WP1130) | 1.79 | 3.13 | 2.43 | 2.45 | 0.67 |
| Aminoglutethimide (Cytadren) | 3.18 | 3.90 | 3.48 | 3.52 | 0.36 |
| Toremifene Citrate (Fareston, Acapodene) | 1.81 | 2.58 | 1.80 | 2.06 | 0.45 |
| Sonidegib | 5.19 | 2.81 | 2.37 | 3.46 | 1.52 |
| Dexamethasone | 230.56 | 1.78 | 3.45 | 78.60 | 131.61 |
| 4SC-202 | 3.44 | 3.06 | 3.37 | 3.29 | 0.20 |
| ML323 | 1.46 | 1.94 | 6.47 | 3.29 | 2.76 |
| Celecoxib | 2.17 | 1.63 | 1.90 | 1.90 | 0.27 |
| Phloretin | 9.66 | 1.62 | 15.89 | 9.05 | 7.15 |
| Mesna | 3.80 | 2.73 | 2.61 | 3.04 | 0.66 |
| RO4929097 | 1.77 | 1.83 | 3.28 | 2.29 | 0.85 |
| idelalisib | 2.75 | 9.24 | 3.87 | 5.29 | 3.47 |
| Ponatinib (AP24534) | 6.09 | 5.83 | 3.44 | 5.12 | 1.46 |
| LY2584702 tosylate | 7.71 | 3.96 | 3.81 | 5.16 | 2.21 |
| Rigosertib (ON-01910) | 12.23 | 5.95 | 2.37 | 6.85 | 4.99 |
| Floxuridine | 3.48 | 2.54 | 2.59 | 2.87 | 0.53 |
| KU-60019 | 3.37 | 2.77 | 2.67 | 2.94 | 0.38 |
| Hydroxyurea (Cytodrox) | 4.58 | 6.75 | 2.37 | 4.57 | 2.19 |
| SGI-1776 free base | 3.54 | 2.60 | 2.16 | 2.77 | 0.70 |
| Cyclosporin A (Cyclosporine A) | 13.45 | 2.00 | 2.20 | 5.88 | 6.55 |
| Regorafenib (BAY 73-4506) | 5.78 | 3.10 | 1.84 | 3.57 | 2.01 |
| BI-847325 | 2.56 | 2.57 | 2.67 | 2.60 | 0.06 |
| Fludarabine (Fludara) | 4.28 | 3.55 | 2.59 | 3.48 | 0.85 |
| Mycophenolate mofetil (CellCept) | 10.76 | 2.36 | 4.35 | 5.83 | 4.39 |
| BKM120 (NVP-BKM120) | 3.73 | 3.07 | 3.65 | 3.49 | 0.36 |
| Lapatinib | 3.34 | 3.11 | 2.49 | 2.98 | 0.44 |
| EPIGALLOCATECHIN-3-MONOGALLATE | 10.09 | 4.19 | 4.88 | 6.38 | 3.23 |
| LY2603618 (IC-83) | 2.26 | 3.63 | 2.96 | 2.95 | 0.69 |
| Raltitrexed (Tomudex) | 4.06 | 5.75 | 3.49 | 4.43 | 1.17 |
| LTX-315 | 2.65 | 1.89 | 2.15 | 2.23 | 0.38 |
| Divalproex sodium | 14.48 | 8.35 | 2.34 | 8.39 | 6.07 |
| CYC116 | 3.21 | 23.86 | 7.74 | 11.60 | 10.85 |
| tanshinone | 2.57 | 2.94 | 3.79 | 3.10 | 0.63 |
| TAME | 3.26 | 4.87 | 2.49 | 3.54 | 1.22 |
| chrysophanic acid | 4.43 | 2.63 | 2.91 | 3.32 | 0.97 |
| Mitoxantrone Hydrochloride | 1.21 | 1.59 | 8.55 | 3.78 | 4.13 |
| Tivozanib (AV-951) | 4.12 | 3.39 | 2.11 | 3.21 | 1.02 |
| XMD8-92 | 1.95 | 2.98 | 4.86 | 3.26 | 1.47 |
| Thalidomide | 3.19 | 2.94 | 2.39 | 2.84 | 0.41 |
| VU0656495-2 | 3.54 | 2.19 | 1.88 | 2.54 | 0.88 |
| Lonidamine | 2.69 | 4.14 | 2.64 | 3.16 | 0.85 |
| Febuxostat (Uloric) | 2.30 | 2.59 | 2.29 | 2.40 | 0.17 |
| TAK-733 | 2.33 | 3.00 | 2.80 | 2.71 | 0.35 |
| Prednisone (Adasone) | 2.66 | 2.78 | 1.43 | 2.29 | 0.75 |
| ML264 | 1.60 | 1.88 | 2.66 | 2.05 | 0.55 |
| MI-773 (SAR405838) | 1.84 | 3.15 | 1.97 | 2.32 | 0.72 |
| Doxorubicin (Adriamycin) | 1.90 | 3.17 | 2.22 | 2.43 | 0.66 |
| C-DIM12 | 2.84 | 2.99 | 2.08 | 2.64 | 0.49 |
| Betapar (Meprednisone) | 3.26 | 2.39 | 2.57 | 2.74 | 0.46 |
| Busulfan (Myleran, Busulfex) | 3.05 | 2.34 | 2.34 | 2.58 | 0.41 |
| Allopurinol | 2.35 | 2.94 | 2.23 | 2.51 | 0.38 |
| BMS 777607 | 2.43 | 12.43 | 3.16 | 6.01 | 5.57 |
| Palbociclib | 1.36 | 3.19 | 2.23 | 2.26 | 0.92 |
| CH5183284 (Debio-1347) | 1.94 | 2.33 | 2.12 | 2.13 | 0.20 |
| Exemestane | 4.65 | 3.61 | 3.13 | 3.79 | 0.78 |
| YH239-EE | 1.18 | 1.56 | 1.25 | 1.33 | 0.20 |
| Azacitidine (Vidaza) | 3.28 | 2.69 | 2.10 | 2.69 | 0.59 |
| Gossypol | 2.60 | 2.53 | 3.01 | 2.71 | 0.26 |
| Ixazomib (MLN2238) | 4.17 | 2.63 | 7.68 | 4.83 | 2.59 |
| Hydrocortisone (Cortisol) | 2.81 | 1.93 | 2.76 | 2.50 | 0.49 |
| miltefosine | 8.14 | 3.93 | 12.02 | 8.03 | 4.05 |
| Dacarbazine (DTIC-Dome) | 3.03 | 2.32 | 1.49 | 2.28 | 0.77 |
| Methotrexate | 4.80 | 3.19 | 2.46 | 3.48 | 1.20 |
| Pilaralisib (XL147) | 1.12 | 1.91 | 1.58 | 1.54 | 0.39 |
| Fluvastatin sodium (Lescol) | 5.50 | 4.00 | 2.76 | 4.09 | 1.38 |
| GW3965 HCl | 4.50 | 2.66 | 1.93 | 3.03 | 1.33 |
| BI6727 (Volasertib) | 3.79 | 1.73 | 4.88 | 3.47 | 1.60 |
| Simvastatin (Zocor) | 2.25 | 2.12 | 2.26 | 2.21 | 0.08 |
| APTSTAT3-9R | 2.85 | 2.45 | 2.44 | 2.58 | 0.23 |
| 2-Methoxyestradiol | 2.15 | 3.13 | 1.96 | 2.41 | 0.62 |
| Oxaliplatin (Eloxatin) | 0.90 | 2.19 | 1.79 | 1.63 | 0.66 |
| Nutlin-3A | 1.74 | 1.77 | 2.37 | 1.96 | 0.36 |
| AZD1480 | 22.28 | 2.97 | 1.95 | 9.07 | 11.46 |
| AZD8055 | 1.93 | 2.64 | 2.57 | 2.38 | 0.39 |
| Oridonin (Isodonol) | 2.07 | 6.32 | 1.83 | 3.41 | 2.52 |
| Maraviroc | 2.60 | 6.64 | 1.57 | 3.60 | 2.68 |
| AT7519 | 2.48 | 14.44 | 1.70 | 6.20 | 7.14 |
| Ftorafur | 3.46 | 3.71 | 2.52 | 3.23 | 0.63 |
| Letrozole | 2.38 | 2.03 | 2.21 | 2.21 | 0.18 |
| WIKI4 | 1.84 | 2.48 | 1.13 | 1.82 | 0.68 |
| OSI-420 (Desmethyl Erlotinib) | 2.50 | 1.81 | 1.78 | 2.03 | 0.41 |
| 1-(4-dimethylaminomethylphenyl) | 5.07 | 3.01 | 2.80 | 3.63 | 1.25 |
| Telatinib (BAY 57-9352) | 3.94 | 2.66 | 1.92 | 2.84 | 1.02 |
| DAPT (GSI-IX) | 2.37 | 5.94 | 2.48 | 3.60 | 2.03 |
| Mitomycin | 2.44 | 3.69 | 2.58 | 2.90 | 0.68 |
| Bafetinib (INNO-406) | 3.51 | 3.34 | 3.13 | 3.33 | 0.19 |
| HO-3867 | 2.40 | 3.14 | 2.19 | 2.58 | 0.50 |
| ODM-201 | 1.92 | 1.15 | 2.44 | 1.83 | 0.65 |
| Mycophenolic (Mycophenolate) | 2.87 | 2.88 | 2.00 | 2.58 | 0.50 |
| Formestane | 4.32 | 3.28 | 2.74 | 3.44 | 0.80 |
| Rosiglitazone HCl | 3.73 | 2.27 | 2.08 | 2.70 | 0.90 |
| Medroxyprogesterone acetate | 2.56 | 2.72 | 1.91 | 2.40 | 0.43 |
| VER-50589 | 2.39 | 3.56 | 1.77 | 2.57 | 0.91 |
| Doxercalciferol (Hectorol) | 2.12 | 1.89 | 2.54 | 2.18 | 0.33 |
| TIC10 | 34.48 | 1.12 | 3.22 | 12.94 | 18.68 |
| Dovitinib (TKI-258, CHIR-258) | 1.60 | 2.58 | 2.73 | 2.31 | 0.61 |
| Triamcinolone Acetonide | 3.40 | 2.16 | 2.30 | 2.62 | 0.68 |
| limonin | 9.67 | 2.77 | 1.86 | 4.77 | 4.27 |
| DCC-2036 (Rebastinib) | 3.81 | 4.11 | 1.58 | 3.17 | 1.38 |
| Omipalisib (GSK2126458, GSK458) | 3.49 | 3.88 | 1.25 | 2.87 | 1.42 |
| PF-06463922 | 2.33 | 1.74 | 1.68 | 1.92 | 0.36 |
| SB939 (Pracinostat) | 1.58 | 1.88 | 1.98 | 1.81 | 0.21 |
| PU-H71 | 1.62 | 1.42 | 1.96 | 1.67 | 0.27 |
| SGI-7079 | 3.12 | 3.08 | 2.20 | 2.80 | 0.52 |
| GW 4064 | 3.65 | 3.56 | 2.60 | 3.27 | 0.58 |
| GSK923295 | 4.36 | 3.71 | 1.92 | 3.33 | 1.26 |
| KU-55933 (ATM Kinase Inhibitor) | 14.69 | 3.25 | 2.44 | 6.79 | 6.86 |
| Fingolimod | 6.97 | 2.82 | 2.63 | 4.14 | 2.45 |
| Ruxolitinib (INCB018424) | 3.84 | 1.34 | 1.68 | 2.29 | 1.36 |
| Methazolastone | 5.28 | 4.15 | 2.50 | 3.97 | 1.40 |
| CNX-2006 | 2.39 | 18.12 | 2.29 | 7.60 | 9.11 |
| Bleomycin sulfate | 29.68 | 4.65 | 2.85 | 12.39 | 15.00 |
| TPCA-1 | 3.79 | 3.52 | 4.26 | 3.86 | 0.37 |
| SH-4-54 | 3.98 | 2.01 | 2.17 | 2.72 | 1.09 |
| LY 294002 | 2.76 | 2.53 | 2.76 | 2.68 | 0.13 |
| PF-3758309 | 2.68 | 1.97 | 6.34 | 3.66 | 2.35 |
| XL765 | 2.14 | 2.67 | 2.34 | 2.38 | 0.27 |
| Vemurafenib (PLX4032) | 4.46 | 2.24 | 2.47 | 3.06 | 1.22 |
| Osimertinib | 2.94 | 3.39 | 2.63 | 2.99 | 0.38 |
| CPI-203 | 4.17 | 4.26 | 3.27 | 3.90 | 0.55 |
| Vitamin E | 2.70 | 2.38 | 1.77 | 2.28 | 0.47 |
| trametinib | 2.96 | 2.91 | 1.84 | 2.57 | 0.63 |
| Mocetinostat (MGCD0103) | 4.09 | 2.75 | 12.02 | 6.28 | 5.01 |
| Daunorubicin HCl (Daunomycin HCl) | 2.69 | 2.80 | 2.56 | 2.68 | 0.12 |
| WZ4002 | 4.76 | 3.38 | 3.04 | 3.72 | 0.91 |
| Megestrol Acetate | 6.03 | 3.28 | 2.83 | 4.05 | 1.73 |
| KX2-391 | 4.24 | 4.27 | 3.36 | 3.96 | 0.52 |
| AT7519 | 3.19 | 2.16 | 1.86 | 2.40 | 0.70 |
| CW069 | 7.26 | 2.97 | 3.47 | 4.57 | 2.35 |
| Sorafenib (Nexavar) | 2.26 | 2.55 | 3.04 | 2.61 | 0.39 |
| SNS-032 (BMS-387032) | 4.65 | 3.66 | 1.76 | 3.36 | 1.47 |
| Brivanib (BMS-540215) | 2.48 | 1.67 | 2.94 | 2.36 | 0.65 |
| Anastrozole | 5.65 | 3.46 | 3.26 | 4.13 | 1.33 |
| AT13148 | 1.97 | 3.24 | 2.16 | 2.46 | 0.69 |
| Fedratinib (SAR302503, TG101348) | 3.99 | 4.36 | 2.73 | 3.69 | 0.86 |
| Enzastaurin (LY317615) | 4.10 | 4.18 | 3.19 | 3.82 | 0.55 |
| PF-3845 | 5.67 | 4.95 | 2.41 | 4.34 | 1.71 |
| Entinostat | 5.11 | 1.67 | 2.47 | 3.09 | 1.80 |
| BMS-536924 | 5.58 | 3.76 | 2.81 | 4.05 | 1.41 |
| AZ5104 | 3.99 | 3.28 | 8.43 | 5.23 | 2.79 |
| Irinotecan HCl Trihydrate (Campto) | 4.07 | 2.42 | 2.48 | 2.99 | 0.94 |
| CH5132799 | 5.73 | 3.25 | 3.69 | 4.22 | 1.32 |
| PF-562271 | 3.95 | 2.57 | 2.30 | 2.94 | 0.88 |
| CB-839 | 2.78 | 2.62 | 3.10 | 2.83 | 0.24 |
| Tofacitinib citrate (CP-690550 citrate) | 5.73 | 3.13 | 4.35 | 4.41 | 1.30 |
| 4-(4-(Benzo[d][1,3]dioxol-5-yl) | 6.20 | 3.22 | 10.52 | 6.65 | 3.67 |
| Lapatinib | 6.97 | 3.28 | 2.72 | 4.33 | 2.31 |
| WZB117 | 5.92 | 5.90 | 2.68 | 4.83 | 1.86 |
| Bendamustine HCL | 6.27 | 4.69 | 3.35 | 4.77 | 1.46 |
| Anagrelide HCl | 5.52 | 6.03 | 4.10 | 5.22 | 1.00 |
| Triptolide | 9.59 | 2.98 | 1.74 | 4.77 | 4.22 |
| Flutamide (Eulexin) | 3.38 | 3.91 | 2.18 | 3.16 | 0.89 |
| JNK-IN-8 | 6.11 | 4.16 | 2.70 | 4.32 | 1.71 |
| SU11274 | 3.38 | 2.99 | 2.14 | 2.84 | 0.63 |
| Sotrastaurin (AEB071) | 4.41 | 3.24 | 1.96 | 3.20 | 1.22 |
| AZD1208 | 6.50 | 3.58 | 2.91 | 4.33 | 1.91 |
| Etoposide (VP-16) | 3.95 | 17.35 | 2.83 | 8.04 | 8.08 |
| GSK2334470 | 5.20 | 3.78 | 2.61 | 3.86 | 1.30 |
| VU0656030-2 | 2.83 | 4.44 | 1.73 | 3.00 | 1.36 |
| Torin 2 | 3.16 | 3.11 | 2.22 | 2.83 | 0.53 |
| IOX1 | 3.87 | 2.39 | 1.65 | 2.64 | 1.13 |
| ABC294640 | 51.87 | 2.84 | 2.50 | 19.07 | 28.41 |
| LY2874455 | 4.17 | 2.24 | 1.76 | 2.72 | 1.28 |
| TMP269 | 1.94 | 2.83 | 2.44 | 2.40 | 0.45 |
| Quizartinib (AC220) | 1.96 | 2.68 | 1.89 | 2.18 | 0.44 |
| Iniparib (BSI-201) | 3.14 | 4.77 | 1.47 | 3.13 | 1.65 |
| OSI-906 (Linsitinib) | 3.60 | 2.67 | 2.34 | 2.87 | 0.65 |
| NVP-BSK805 2HCl | 1.74 | 1.80 | 1.72 | 1.75 | 0.04 |
| SF1670 (PTEN inhibitor) | 6.75 | 2.86 | 2.82 | 4.14 | 2.26 |
| 6H05 | 2.48 | 5.17 | 2.03 | 3.22 | 1.70 |
| BAY 11-7082 | 2.67 | 0.99 | 1.83 | 1.83 | 0.84 |
| GDC-0879 | 2.12 | 2.82 | 3.53 | 2.82 | 0.70 |
| danthron | 4.89 | 4.32 | 5.69 | 4.97 | 0.69 |
| Crenolanib (CP-868596) | 2.75 | 2.67 | 2.05 | 2.49 | 0.38 |
| GSK650394 | 2.40 | 3.13 | 1.91 | 2.48 | 0.61 |
| MDV3100 (Enzalutamide) | 4.44 | 3.54 | 2.42 | 3.46 | 1.01 |
| Gemcitabine (Gemzar) | 4.39 | 4.10 | 2.18 | 3.56 | 1.20 |
| Sunitinib Malate (Sutent) | 2.35 | 2.21 | 2.84 | 2.47 | 0.33 |
| BTZ043 racemate | 3.21 | 3.33 | 2.36 | 2.97 | 0.53 |
| Lenvatinib | 23.75 | 2.93 | 2.27 | 9.65 | 12.22 |
| Evista (Raloxifene Hydrochloride) | 2.49 | 2.59 | 2.77 | 2.62 | 0.14 |
| ABT-263 (Navitoclax) | 3.40 | 2.71 | 2.09 | 2.73 | 0.66 |
| 17-DMAG HCl (Alvespimycin) | 2.64 | 1.63 | 2.04 | 2.11 | 0.51 |
| Quercetin | 4.70 | 2.94 | 2.65 | 3.43 | 1.11 |
| Nilotinib (AMN-107) | 1.98 | 1.38 | 1.56 | 1.64 | 0.31 |
| Dasatinib (BMS-354825) | 3.32 | 2.89 | 1.87 | 2.69 | 0.74 |
| Y-27632 2HCl | 24.86 | 6.25 | 1.89 | 11.00 | 12.20 |
| LDC000067 | 4.01 | 2.93 | 2.22 | 3.05 | 0.90 |
| PF-04217903 | 1.77 | 2.85 | 1.71 | 2.11 | 0.64 |
| Vorinostat (SAHA) | 2.93 | 2.60 | 2.08 | 2.54 | 0.43 |
| Lomustine (CeeNU) | 3.82 | 4.67 | 1.90 | 3.47 | 1.42 |
| Nutlin-3A | 1.38 | 2.15 | 1.71 | 1.75 | 0.38 |
| CEP33779 | 3.74 | 2.57 | 1.60 | 2.64 | 1.07 |
| PD173955 | 5.13 | 3.70 | 2.83 | 3.89 | 1.16 |
| Pexmetinib (ARRY-614) | 3.84 | 3.38 | 2.12 | 3.12 | 0.89 |
| PF-543 | 7.42 | 2.64 | 1.86 | 3.98 | 3.01 |
| RSL3 | 3.16 | 2.46 | 1.90 | 2.51 | 0.63 |
| Endoxifen HCl | 4.22 | 3.29 | 1.81 | 3.11 | 1.21 |
| 4-Hydroxytamoxifen | 1.29 | 2.83 | 2.27 | 2.13 | 0.78 |
| sulfabenzamide | 4.00 | 3.58 | 2.92 | 3.50 | 0.54 |
| AZD8186 | 4.09 | 2.69 | 1.85 | 2.88 | 1.13 |
| PND-1186 (VS-4718) | 2.28 | 1.49 | 2.73 | 2.17 | 0.63 |
| DalcetrapibèJTT-705é | 4.88 | 4.43 | 3.50 | 4.27 | 0.70 |
| Phosphoramidon Disodium Salt | 3.90 | 2.43 | 1.71 | 2.68 | 1.11 |
| Teniposide (Vumon) | 2.72 | 6.58 | 2.54 | 3.94 | 2.28 |
| Afatinib (BIBW2992) | 2.90 | 2.72 | 1.91 | 2.51 | 0.52 |
| Z-VAD-FMK | 87.20 | 12.35 | 6.33 | 35.29 | 45.05 |
| VU0656122-2 | 8.56 | 3.51 | 2.83 | 4.97 | 3.13 |
| CX-6258 HCl | 3.59 | 4.14 | 2.02 | 3.25 | 1.10 |
| ARQ 621 | 2.96 | 2.73 | 1.13 | 2.27 | 0.99 |
| Deltarasin | 4.79 | 3.62 | 2.33 | 3.58 | 1.23 |
| Geldanamycin | 2.62 | 2.55 | 2.14 | 2.44 | 0.26 |
| PFK15 | 3.42 | 2.75 | 1.66 | 2.61 | 0.89 |
| (E)-N'-(3-Allyl-2-hydroxybenzylidene) | 3.21 | 1.60 | 1.86 | 2.23 | 0.86 |
| DMXAA (Vadimezan) | 2.87 | 6.66 | 4.01 | 4.51 | 1.94 |
| MI-2 (MALT1 inhibitor) | 4.77 | 2.83 | 2.45 | 3.35 | 1.25 |
| CYT997 | 3.53 | 1.64 | 1.55 | 2.24 | 1.12 |
| Adrucil (Fluorouracil) | 1.77 | 6.94 | 1.97 | 3.56 | 2.93 |
| INCB024360 analogue | 4.77 | 1.60 | 1.73 | 2.70 | 1.79 |
| Apitolisib (GDC-0980, RG7422) | 3.60 | 3.13 | 2.43 | 3.05 | 0.59 |
| CUDC-101 | 7.14 | 4.77 | 7.03 | 6.31 | 1.34 |
| Tamoxifen Citrate (Nolvadex) | 1.25 | 1.29 | 1.41 | 1.32 | 0.08 |
| cx-4945 (Silmitasertib) | 3.38 | 3.23 | 6.21 | 4.27 | 1.68 |
| Alpelisib (BYL719) | 4.31 | 2.73 | 2.94 | 3.33 | 0.86 |
| Epothilone A | 4.53 | 2.60 | 6.68 | 4.60 | 2.04 |
| Calcium levofolinate (Calcium Folinate) | 4.51 | 4.31 | 3.12 | 3.98 | 0.75 |
| Duvelisib (IPI-145, INK1197) | 3.33 | 2.53 | 1.94 | 2.60 | 0.70 |
| PI3K/HDAC Inhibitor I | 5.20 | 2.86 | 2.08 | 3.38 | 1.62 |
| BMS 794833 | 3.24 | 3.06 | 1.88 | 2.73 | 0.74 |
| Fosbretabulin (Combretastatin A4 Phosphate, | 3.39 | 3.93 | 3.32 | 3.54 | 0.33 |
| CZC24832 | 7.81 | 3.79 | 7.83 | 6.48 | 2.33 |
| (5E)-5-[(2,2-Difluoro-1,3-benzodioxol-5-YL) | 4.86 | 3.24 | 2.79 | 3.63 | 1.09 |
| INH1 | 6.12 | 1.56 | 1.73 | 3.14 | 2.59 |
| Turofexorate Isopropyl (XL335) | 4.61 | 3.16 | 2.39 | 3.39 | 1.13 |
| TG100-115 | 3.62 | 3.71 | 1.34 | 2.89 | 1.34 |
| 3-Methyladenine (3-MA) | 3.91 | 6.32 | 2.95 | 4.39 | 1.74 |
| GF 109203X | 2.81 | 1.87 | 1.77 | 2.15 | 0.57 |
| SB-3CT | 5.89 | 2.12 | 1.87 | 3.29 | 2.25 |
| GDC-0349 | 3.70 | 2.42 | 2.37 | 2.83 | 0.76 |
| PIK-294 | 3.94 | 2.18 | 1.94 | 2.68 | 1.09 |
| GSK2606414 | 16.55 | 1.56 | 1.12 | 6.41 | 8.79 |
| RG108 | 4.13 | 3.12 | 2.86 | 3.37 | 0.67 |
| VPS34-IN1 | 2.44 | 1.32 | 1.55 | 1.77 | 0.59 |
| AMG319 | 4.10 | 2.54 | 1.77 | 2.80 | 1.19 |
| K-Ras(G12C) inhibitor 9 | 3.23 | 2.19 | 2.85 | 2.75 | 0.53 |
| YO-01027 (Dibenzazepine) | 3.87 | 3.37 | 2.50 | 3.25 | 0.70 |
| WAY-600 | 4.13 | 3.42 | 2.39 | 3.31 | 0.88 |
| AS-252424 | 4.82 | 13.78 | 2.18 | 6.93 | 6.08 |
| Clioquinol | 3.37 | 2.19 | 1.92 | 2.49 | 0.77 |
| Nocodazole | 6.13 | 2.90 | 2.86 | 3.96 | 1.88 |
| AZD2014 | 2.74 | 2.70 | 1.79 | 2.41 | 0.54 |
| MLN2480 | 11.83 | 2.80 | 2.37 | 5.66 | 5.34 |
| MK-0752 | 20.33 | 4.37 | 2.49 | 9.06 | 9.80 |
| AMG 900 | 4.57 | 2.40 | 1.84 | 2.94 | 1.44 |
| AZD6482 | 5.31 | 4.31 | 3.79 | 4.47 | 0.77 |
| LY3023414 | 4.63 | 4.92 | 2.04 | 3.86 | 1.58 |
| RG7112 (RO5045337) | 3.40 | 3.00 | 2.03 | 2.81 | 0.70 |
| AZ 3146 | 2.60 | 2.42 | 2.10 | 2.37 | 0.25 |
| Asiatic acid | 4.19 | 2.48 | 1.36 | 2.68 | 1.43 |
| Palomid 529 | 4.00 | 4.28 | 3.94 | 4.08 | 0.18 |
| VU0656492-2 | 5.07 | 3.38 | 2.12 | 3.52 | 1.48 |
| Isotretinoin | 19.19 | 4.02 | 2.95 | 8.72 | 9.08 |
| Chloroquine | 3.44 | 2.54 | 2.46 | 2.81 | 0.55 |
| PD-98059 | 7.00 | 2.09 | 2.01 | 3.70 | 2.86 |
| Galunisertib (LY2157299) | 4.11 | 2.22 | 2.11 | 2.81 | 1.13 |
| Ifosfamide | 4.45 | 3.25 | 2.04 | 3.25 | 1.20 |
| A66 | 4.23 | 2.05 | 2.37 | 2.88 | 1.18 |
| NVP-BGT226 | 4.64 | 4.61 | 2.33 | 3.86 | 1.33 |
| WYE-354 | 2.99 | 2.00 | 1.33 | 2.11 | 0.84 |
| Imatinib (Gleevec) | 3.23 | 2.57 | 1.91 | 2.57 | 0.66 |
| CCT128930 | 3.50 | 2.56 | 1.54 | 2.53 | 0.98 |
| GSK2292767 | 4.54 | 4.41 | 2.94 | 3.96 | 0.89 |
